# Supplementary material for: El feliz retorno de la cigüeña blanca: el último censo confirma una espectacular recuperación de la especie en España
Source: MDPI journal article supplement (doi:10.3390/molecules27092992), 1995-01-01
Supplement: s1 [file s1]

**Table S1.** Composition of OCE.

| English Name               | Scientific Name                             | Family         | Using Part | Origin                | Amount (g) | Ratio (%) |
|----------------------------|---------------------------------------------|----------------|------------|-----------------------|------------|-----------|
| Angelicae Gigas Root       | <i>Angelica gigas</i> Nakai                 | Apiaceae       | Root       | Pyeongchang,<br>Korea | 625.0      | 12.5      |
| Cnidium Rhizome            | <i>Cnidium officinale</i> Makino            | Umbelliferae   | Rhizome    | Yeongyang, Korea      | 625.0      | 12.5      |
| Paoy Root                  | <i>Paeonia lactiflora</i> Pall.             | Paeoniaceae    | Root       | Uiseong, Korea        | 625.0      | 12.5      |
| Prepared Rehmannia<br>Root | <i>Rehmannia glutinosa</i> (Gaertn.) DC.    | Plantaginaceae | Root       | Jeongeup, Korea       | 625.0      | 12.5      |
| Coptis Rhizome             | <i>Coptis chinensis</i> Franch.             | Ranunculaceae  | Rhizome    | China                 | 625.0      | 12.5      |
| Phellodendron Bark         | <i>Phellodendron chinensis</i> C.K.Schneid. | Rutaceae       | Bark       | China                 | 625.0      | 12.5      |
| Scutellaria Root           | <i>Scutellaria baicalensis</i> Georgi       | Lamiaceae      | Root       | Yeosu, Korea          | 625.0      | 12.5      |
| Gardenia Fruit             | <i>Gardenia jasminoides</i> Ellis           | Rubiaceae      | Fruit      | Imsil, Korea          | 625.0      | 12.5      |
|                            |                                             |                |            | Total                 | 5000.0     | 100.0     |

**Table S2.** HPLC chromatographic conditions for analyzing the 19 markers of OCE.

| Chromatographic Parameter |                                                                    |       |       |
|---------------------------|--------------------------------------------------------------------|-------|-------|
| Column                    | SunFire™ C <sub>18</sub> analytical column (250 mm × 4.6 mm, 5 μm) |       |       |
| Detector                  | DAD (230, 270, 275, 280, 320, 325, 330, 335, 345, and 355 nm)      |       |       |
| Flow rate (mL/min)        | 1.0                                                                |       |       |
| Injection volume (μL)     | 10.0                                                               |       |       |
| Column temperature (°C)   | 40.0                                                               |       |       |
| Mobile phase              | A: 0.1% (v/v) formic acid in DW                                    |       |       |
|                           | B: 0.1% (v/v) formic acid in ACN                                   |       |       |
| Gradient elution          | Time (min)                                                         | A (%) | B (%) |
|                           | 0                                                                  | 95    | 5     |
|                           | 60                                                                 | 40    | 60    |
|                           | 70                                                                 | 10    | 90    |
|                           | 75                                                                 | 10    | 90    |
|                           | 80                                                                 | 95    | 5     |
|                           | 90                                                                 | 95    | 5     |

**Table S3.** Repeatability of compounds **1–19** (n = 6).

| Analyte   | RSD (%) of retention time | RSD (%) of peak area |
|-----------|---------------------------|----------------------|
| <b>1</b>  | 0.10                      | 0.31                 |
| <b>2</b>  | 0.04                      | 0.55                 |
| <b>3</b>  | 0.05                      | 0.26                 |
| <b>4</b>  | 0.03                      | 0.45                 |
| <b>5</b>  | 0.21                      | 0.26                 |
| <b>6</b>  | 0.18                      | 0.22                 |
| <b>7</b>  | 0.02                      | 0.47                 |
| <b>8</b>  | 0.18                      | 0.35                 |
| <b>9</b>  | 0.16                      | 0.13                 |
| <b>10</b> | 0.01                      | 0.21                 |
| <b>11</b> | 0.02                      | 0.22                 |
| <b>12</b> | 0.01                      | 0.23                 |
| <b>13</b> | 0.07                      | 0.24                 |
| <b>14</b> | 0.01                      | 0.34                 |
| <b>15</b> | 0.06                      | 0.23                 |
| <b>16</b> | 0.01                      | 0.35                 |
| <b>17</b> | 0.01                      | 0.23                 |
| <b>18</b> | 0.01                      | 0.25                 |
| <b>19</b> | 0.01                      | 0.24                 |

Gallic acid (**1**), 5-(hydroxymethyl)furfural (**2**), chlorogenic acid (**3**), geniposide (**4**), coptisine chloride (**5**), jatrorrhizine chloride (**6**), paeoniflorin (**7**), berberine chloride (**8**), palmatine chloride (**9**), ferulic acid (**10**), nodakenin (**11**), benzoic acid (**12**), baicalin (**13**), benzoylpaeoniflorin (**14**), wogonoside (**15**), baicalein (**16**), wogonin (**17**), decursin (**18**), and decursinol angelate (**19**).

**Table S4.** System suitability and stability of compounds **1–19**.

| Analyte   | $k'$  | $\alpha$ | $N$        | $R_s$ | $T_f$ | Stability <sup>a</sup> |
|-----------|-------|----------|------------|-------|-------|------------------------|
| <b>1</b>  | 1.17  | 1.75     | 18808.16   | 8.78  | 1.04  | 1.90                   |
| <b>2</b>  | 2.04  | 1.75     | 50406.01   | 8.78  | 1.04  | 0.68                   |
| <b>3</b>  | 4.51  | 1.15     | 288970.02  | 10.06 | 1.12  | 2.36                   |
| <b>4</b>  | 5.18  | 1.05     | 433890.57  | 4.24  | 1.07  | 0.87                   |
| <b>5</b>  | 5.44  | 1.06     | 528614.53  | 5.35  | 1.11  | 1.65                   |
| <b>6</b>  | 5.75  | 1.07     | 683541.95  | 6.42  | 1.13  | 1.72                   |
| <b>7</b>  | 6.16  | 1.06     | 449183.30  | 5.40  | 1.18  | 1.00                   |
| <b>8</b>  | 6.51  | 1.02     | 827601.97  | 1.77  | 1.10  | 1.54                   |
| <b>9</b>  | 6.61  | 1.02     | 905559.11  | 1.77  | 1.13  | 1.64                   |
| <b>10</b> | 7.35  | 1.04     | 506901.81  | 4.39  | 1.05  | 1.53                   |
| <b>11</b> | 7.67  | 1.04     | 807990.44  | 4.39  | 1.07  | 1.60                   |
| <b>12</b> | 8.71  | 1.14     | 436944.47  | 12.58 | 1.03  | 0.94                   |
| <b>13</b> | 10.68 | 1.14     | 948111.45  | 18.66 | 1.13  | 1.60                   |
| <b>14</b> | 12.19 | 1.03     | 1227146.45 | 3.80  | 1.13  | 1.02                   |
| <b>15</b> | 12.50 | 1.03     | 1148533.50 | 3.80  | 1.09  | 1.58                   |
| <b>16</b> | 13.57 | 1.09     | 1155845.52 | 12.07 | 1.09  | 1.68                   |
| <b>17</b> | 16.38 | 1.21     | 1336977.56 | 28.98 | 1.02  | 1.55                   |
| <b>18</b> | 21.03 | 1.01     | 1707521.47 | 1.69  | 1.01  | 1.77                   |
| <b>19</b> | 21.22 | 1.01     | 1737667.55 | 1.69  | 1.04  | 1.57                   |

<sup>a</sup>Stability was expressed as RSD (%). Gallic acid (**1**), 5-(hydroxymethyl)furfural (**2**), chlorogenic acid (**3**), geniposide (**4**), coptisine chloride (**5**), jatrorrhizine chloride (**6**), paeoniflorin (**7**), berberine chloride (**8**), palmatine chloride (**9**), ferulic acid (**10**), nodakenin (**11**), benzoic acid (**12**), baicalin (**13**), benzoylpaeoniflorin (**14**), wogonoside (**15**), baicalein (**16**), wogonin (**17**), decursin (**18**), and decursinol angelate (**19**).

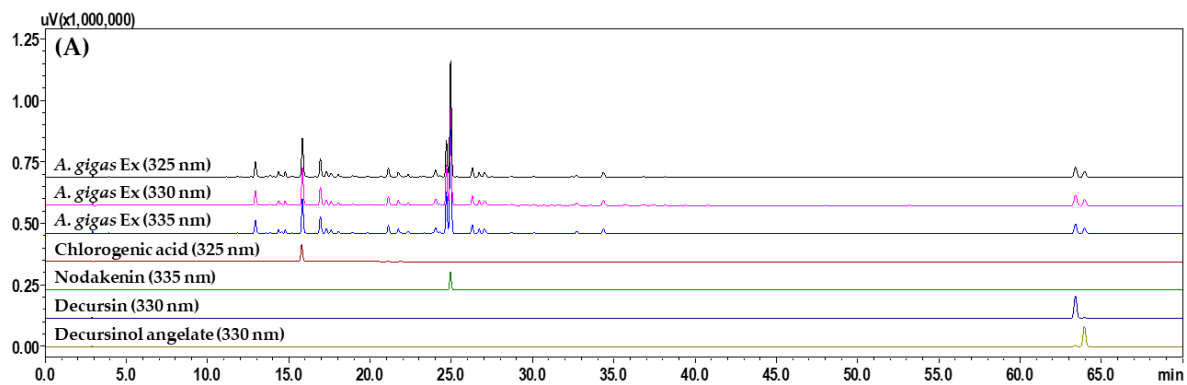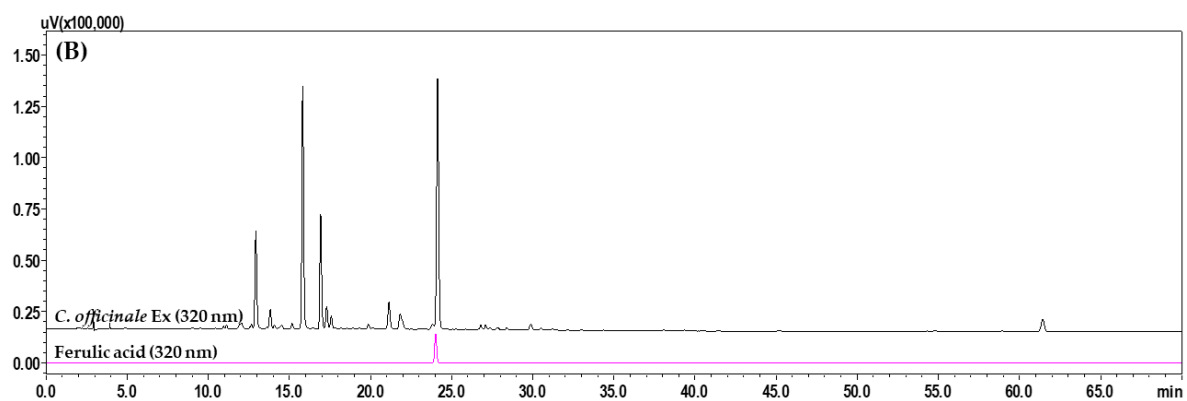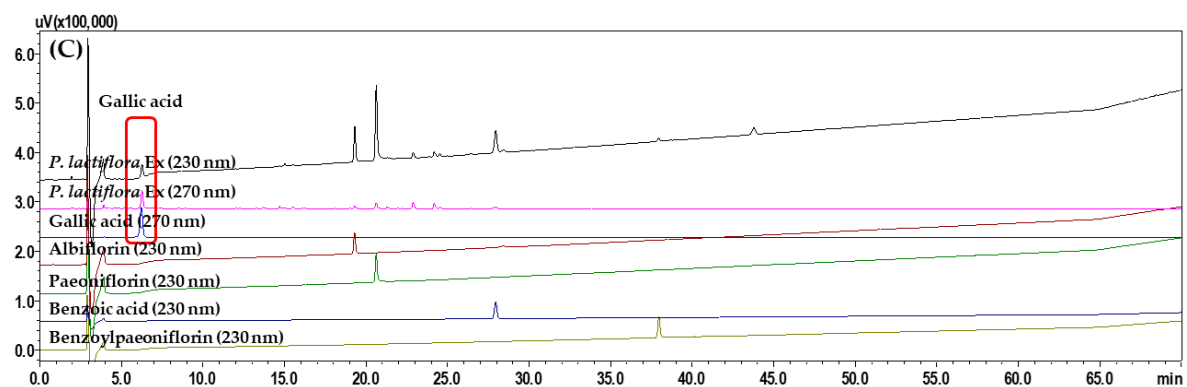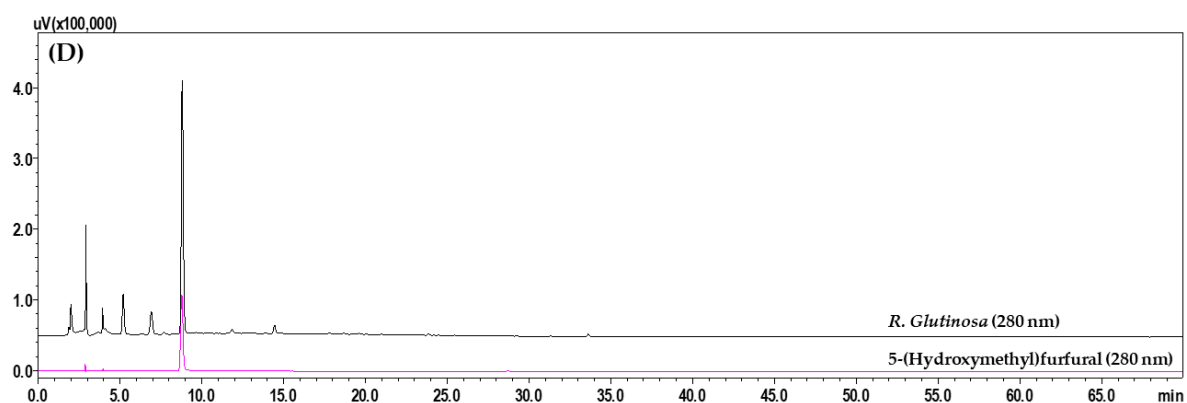

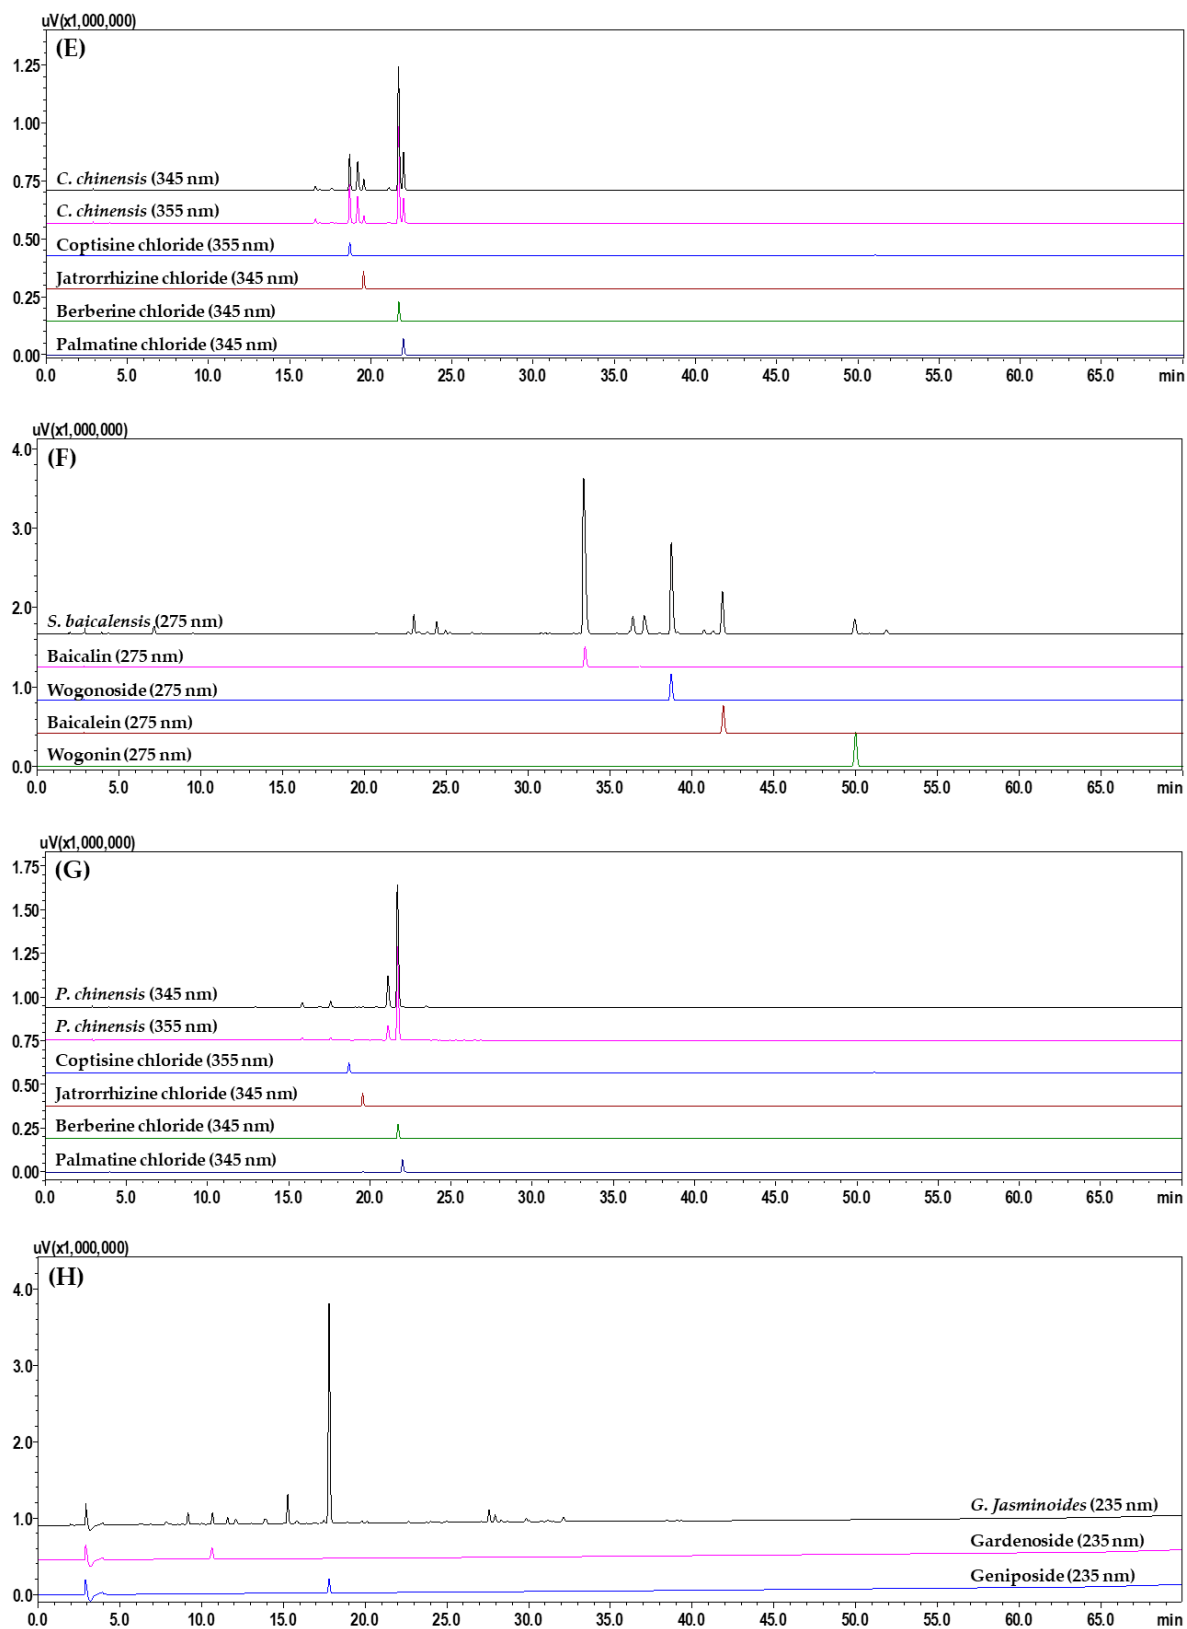

**Figure S1.** HPLC chromatogram of constituent herbal medicines and their main components. A: *A. gigas*, B: *C. officinale*, C: *P. lactiflora*, D: *R. glutinosa*, E: *C. chinensis*, F: *S. baicalensis*, G: *P. chinensis*, H: *G. jasminoides*.

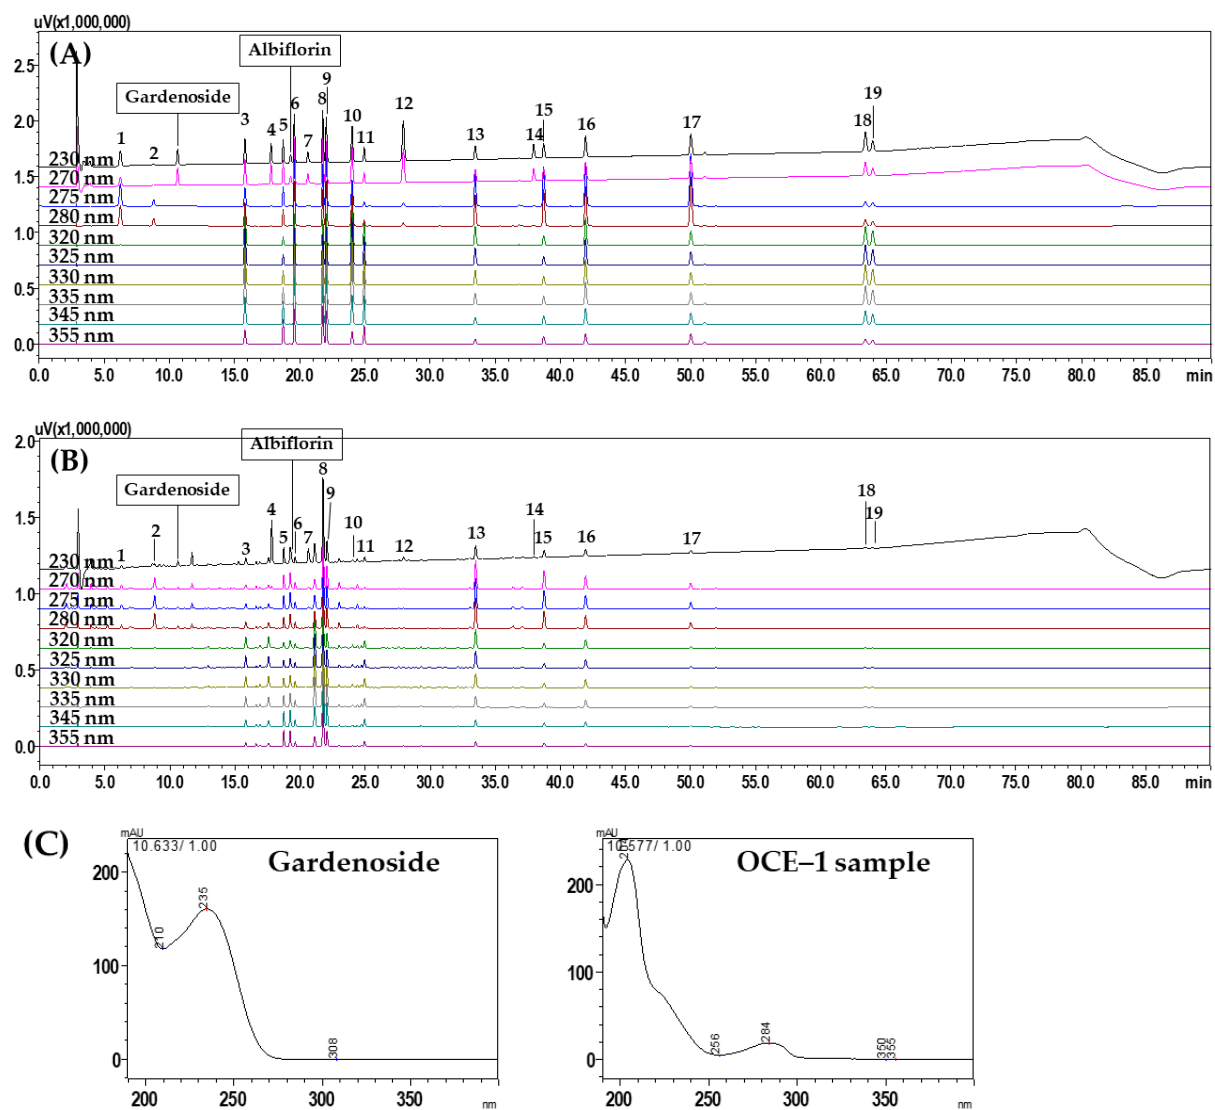

**Figure S2.** HPLC chromatograms of the solution of standard mixture (A) and 70% methanol solution of OCE-1 sample (B), and UV spectrum of gardenoside (C). Gallic acid (1), 5-(hydroxymethyl)furfural (2), chlorogenic acid (3), geniposide (4), coptisine chloride (5), jatrorrhizine chloride (6), paeoniflorin (7), berberine chloride (8), palmatine chloride (9), ferulic acid (10), nodakenin (11), benzoic acid (12), baicalin (13), benzoylpaeoniflorin (14), wogonoside (15), baicalein (16), wogonin (17), decursin (18), and decursinol angelate (19).





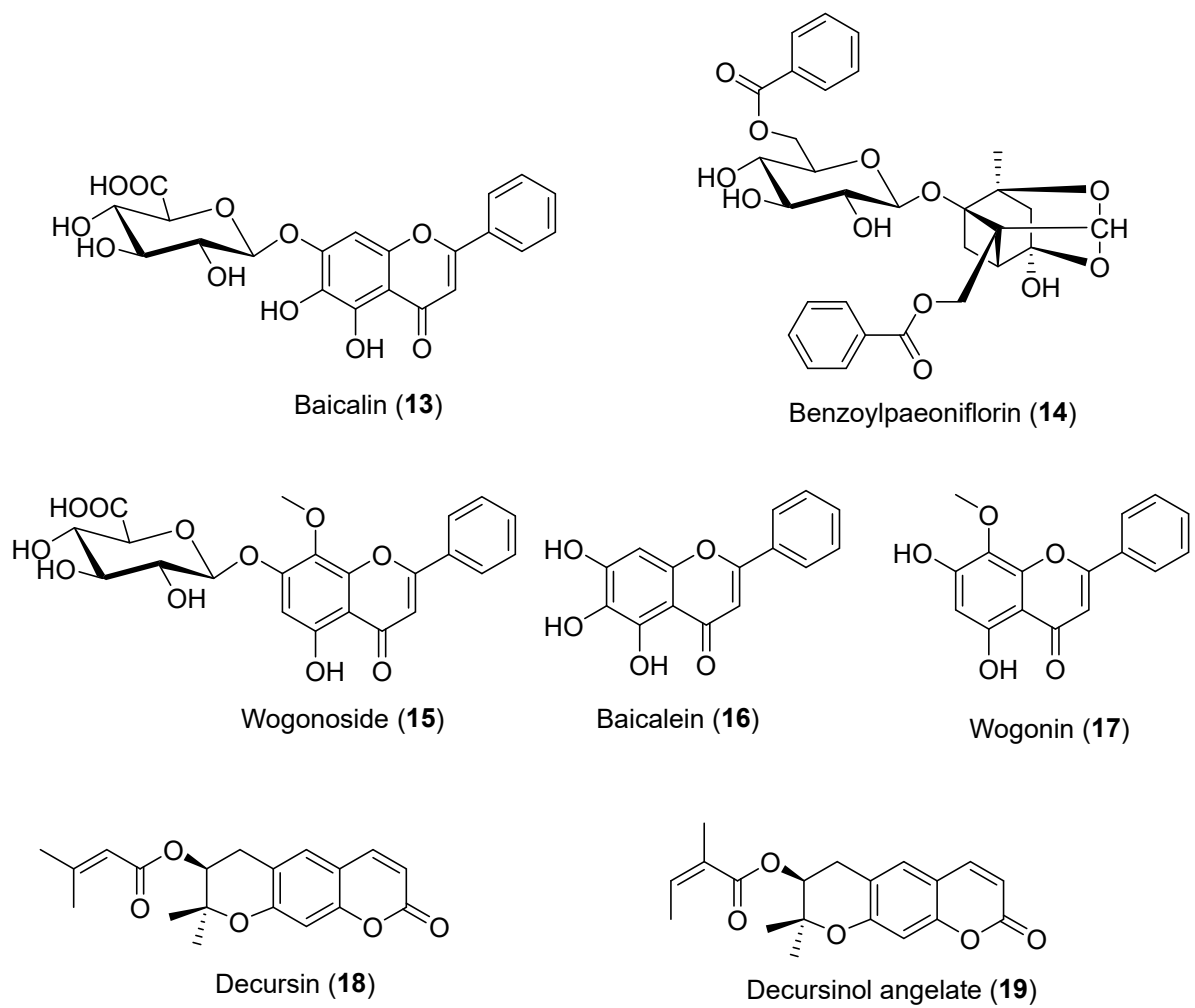

**Figure S3.** Chemical structures of the selected 19 marker compounds for quality control of OCE.

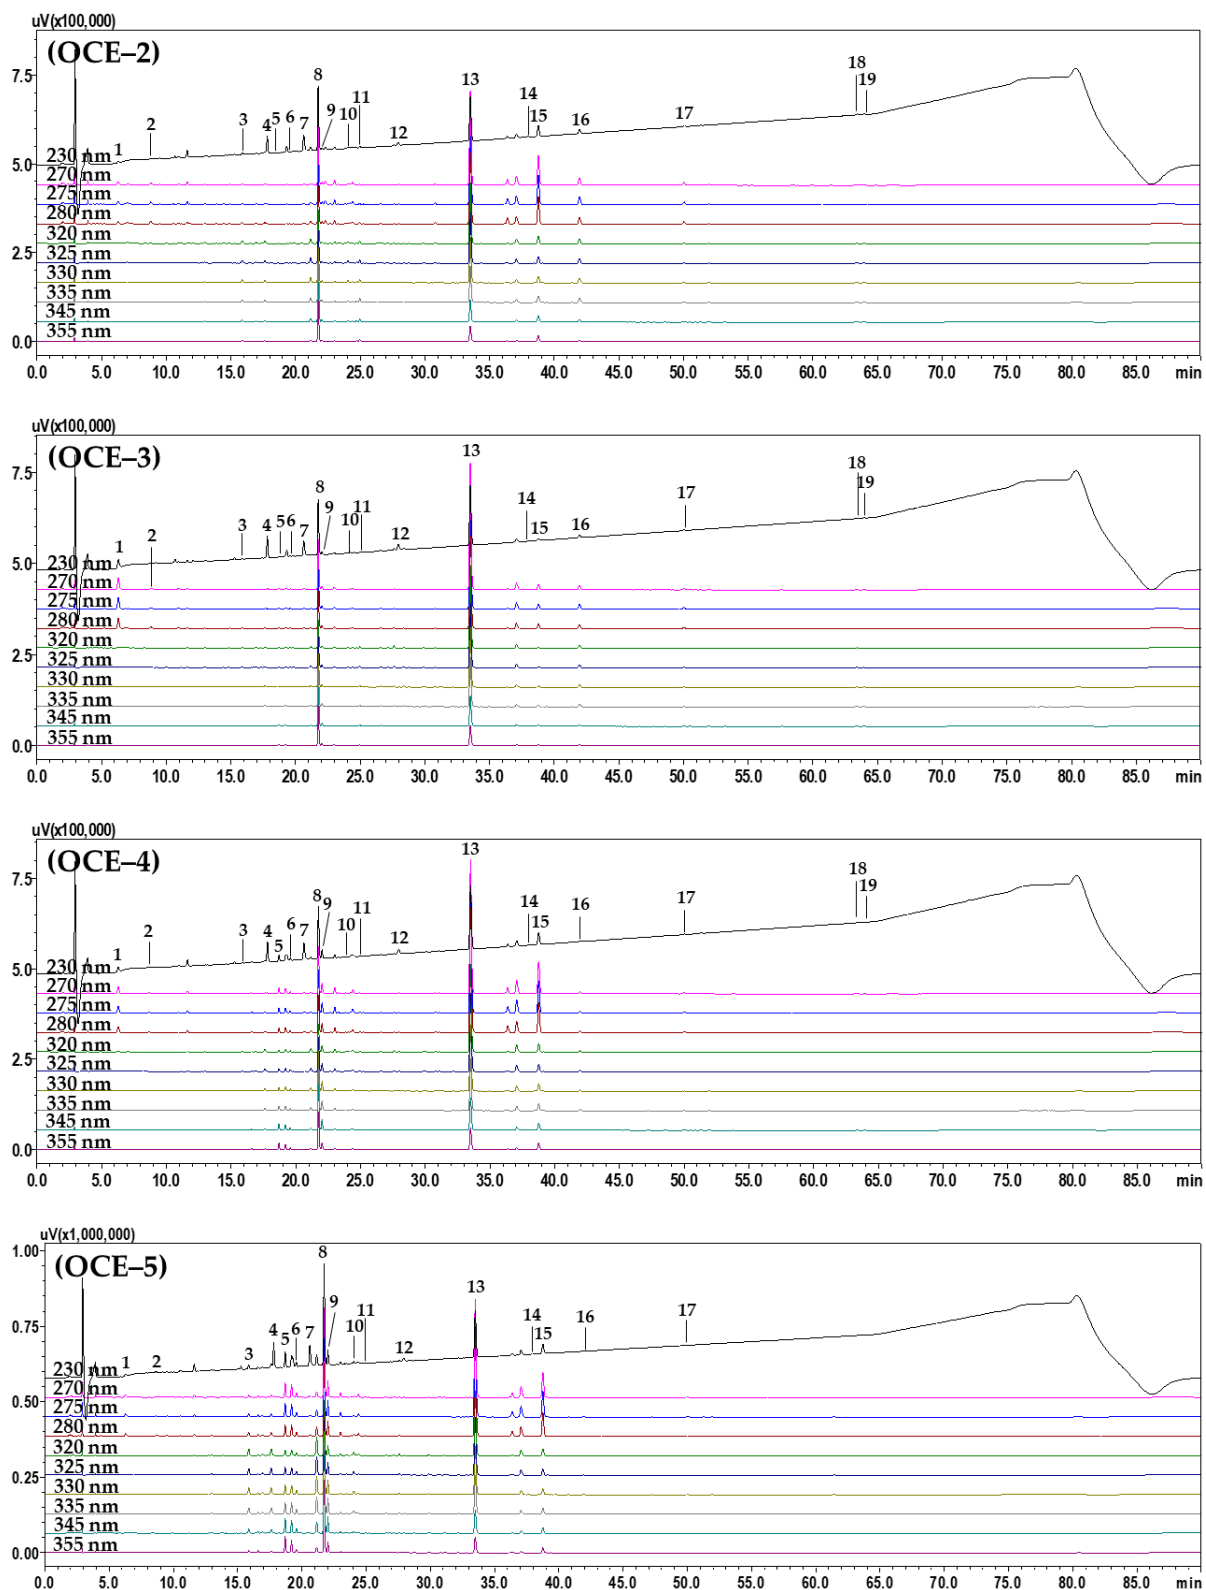

**Figure S4.** HPLC chromatograms of OCE-2 to OCE-5 samples. Gallic acid (1), 5-(hydroxymethyl)furfural (2), chlorogenic acid (3), geniposide (4), coptisine chloride (5), jatrorrhizine chloride (6), paeoniflorin (7), berberine chloride (8), palmatine chloride (9), ferulic acid (10), nodakenin (11), benzoic acid (12), baicalin (13), benzoylpaeoniflorin (14), wogonoside (15), baicalein (16), wogonin (17), decursin (18), and decursinol angelate (19).
